# Supplementary material for: Coexistence of relaxor behavior and ferromagnetic order in multiferroic Pb(Fe0.5Nb0.5)O3–BiFeO3 solid solution
Source: Royal Society of Chemistry journal article supplement (doi:10.1039/d0tc03505j), 2020-01-01
Supplement: d0tc03505j1.pdf [file d0tc03505j1.pdf]

*J. Mater. Chem. C*

## Coexistence of Relaxor Behavior and Ferromagnetic Order in Multiferroic $\text{Pb}(\text{Fe}_{0.5}\text{Nb}_{0.5})\text{O}_3\text{-BiFeO}_3$ Solid Solution

Haijuan Li<sup>1</sup>, Jian Zhuang<sup>1\*</sup>, Alexei A. Bokov<sup>2</sup>, Nan Zhang<sup>1</sup>, Jie Zhang<sup>1</sup>, Wei Ren<sup>1\*</sup>, and  
Zuo-Guang Ye<sup>2\*\*</sup>

<sup>1</sup> Electronic Materials Research Laboratory, Key Laboratory of the Ministry of Education & International Center for Dielectric Research, Xi'an Jiaotong University, Xi'an 710049, China

<sup>2</sup> Department of Chemistry and 4D LABS, Simon Fraser University, Burnaby, British Columbia, V5A 1S6, Canada

\* Corresponding Authors: [zye@sfu.ca](mailto:zye@sfu.ca) (Z.-G. Ye); [jzhuang@xjtu.edu.cn](mailto:jzhuang@xjtu.edu.cn) (J. Zhuang); ; [wren@xjtu.edu.cn](mailto:wren@xjtu.edu.cn) (W. Ren)

### Supplementary Materials

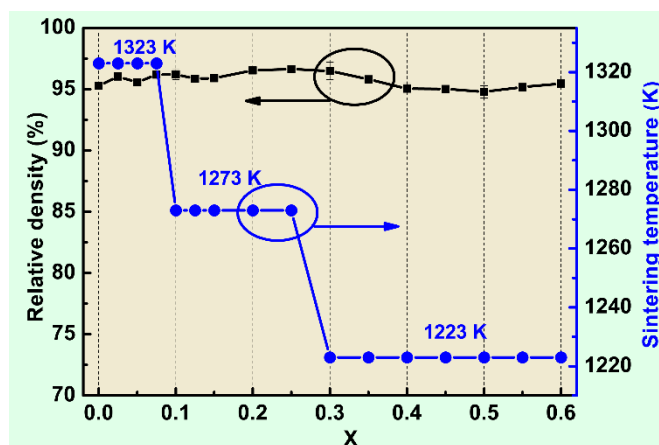

Figure S1. Variation of the relative density ( $\rho$ ) of the ceramics of the  $(1-x)\text{PFN-xBFO}$  solid solution sintered at different temperatures depending on composition.

Table S1. Detailed information on the XRD Rietveld refinement results of the PFN-BFO solid solution for the compositions with  $x \leq 0.4$

| $x$   | $Cm$      |           |            |             |           | $Pm\bar{3}m$ |           | $r$ -factor   |                |            |
|-------|-----------|-----------|------------|-------------|-----------|--------------|-----------|---------------|----------------|------------|
|       | a (Å)     | b (Å)     | c (Å)      | $\beta$ (°) | phase (%) | a (Å)        | phase (%) | $\Gamma_{wp}$ | $\Gamma_{exp}$ | $\Gamma_p$ |
| 0     | 5.6732(3) | 5.6722(4) | 4.01586(8) | 90.034(3)   | 100       |              |           | 11.7          | 11.2           | 8.4        |
| 0.025 | 5.6708(2) | 5.6696(1) | 4.01604(6) | 89.942(2)   | 54.9(2)   | 4.01186(3)   | 45.1(1)   | 10.9          | 10.6           | 7.7        |
| 0.05  | 5.6708(2) | 5.6697(2) | 4.01537(6) | 90.056(2)   | 57.3(1)   | 4.01162(3)   | 42.7(1)   | 11.3          | 10.9           | 7.9        |
| 0.075 | 5.6702(2) | 5.6690(2) | 4.01481(7) | 90.054(2)   | 57.2(3)   | 4.01109(3)   | 42.8(1)   | 11.1          | 10.8           | 7.8        |
| 0.1   | 5.6707(4) | 5.6693(5) | 4.0173(1)  | 90.057(5)   | 41.2(2)   | 4.01106(5)   | 58.8(4)   | 11.2          | 7.7            | 7.1        |
| 0.125 | 5.6700(9) | 5.6694(9) | 4.0153(1)  | 90.039(6)   | 45.9(1)   | 4.01026(9)   | 54.1(2)   | 11.1          | 7.6            | 6.9        |
| 0.15  | 5.6684(6) | 5.6674(6) | 4.0144(1)  | 90.047(5)   | 39.8(3)   | 4.00969(5)   | 60.2(4)   | 11.1          | 7.2            | 6.9        |
| 0.2   | 5.6671(4) | 5.6659(4) | 4.0147(2)  | 90.077(4)   | 36.7(1)   | 4.00891(4)   | 63.3(4)   | 10.4          | 8.2            | 6.6        |
| 0.25  | 5.6652(9) | 5.6636(9) | 4.0164(3)  | 90.070(9)   | 32.2(2)   | 4.00854(7)   | 67.8(2)   | 11.6          | 9.0            | 7.8        |
| 0.3   | 5.6642(7) | 5.6283(4) | 4.0394(3)  | 89.626(8)   | 8.2(3)    | 4.00577(2)   | 91.8(2)   | 7.9           | 6.4            | 6.1        |
| 0.35  |           |           |            |             |           | 4.00441(3)   | 100       | 10.0          | 6.5            | 7.7        |
| 0.4   |           |           |            |             |           | 4.00277(3)   | 100       | 9.1           | 6.4            | 6.9        |

Table S2. The Bragg peak positions in terms of  $2\theta$  angle from XRD Rietveld refinement results using the  $Cm$  and  $Pm\bar{3}m$  phases, respectively, and the FWHM values of the (110) and (111) peaks for  $(1-x)$ PFN- $x$ BFO solid solution ( $x = 0, 0.1, 0.2, 0.3, \text{ and } 0.4$ ).

| Composition<br>$x$ | Peak position (°) |       |              |       | FWHM      |        |
|--------------------|-------------------|-------|--------------|-------|-----------|--------|
|                    | $Cm$              |       | $Pm\bar{3}m$ |       | Test data |        |
|                    | (110)             | (111) | (110)        | (111) | (110)     | (111)  |
| 0                  | 31.54             | 38.85 |              |       | 0.0721    | 0.0617 |
| 0.1                | 31.53             | 38.90 | 31.56        | 38.87 | 0.0719    | 0.0618 |
| 0.2                | 31.57             | 38.90 | 31.54        | 38.88 | 0.0720    | 0.0618 |
| 0.3                | 31.55             | 38.88 | 31.55        | 38.86 | 0.0698    | 0.0603 |
| 0.4                |                   |       | 31.56        | 38.86 | 0.0691    | 0.0590 |

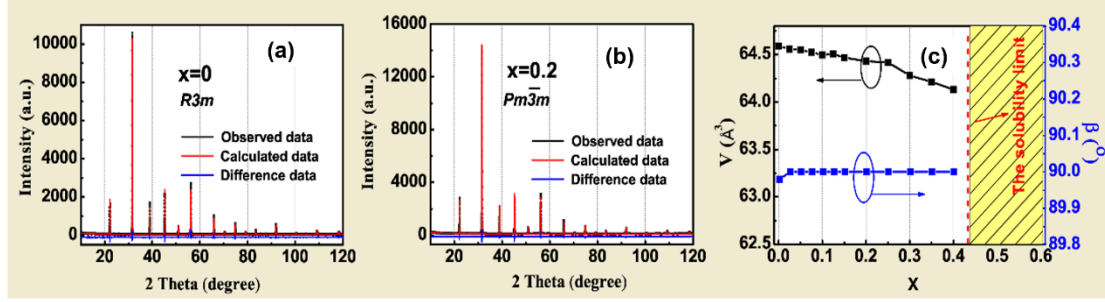

Figure S2. Rietveld refinements results using the  $R3m$  and  $Pm\bar{3}m$  symmetries for (a)  $x = 0$  and (b)  $x = 0.2$ , respectively. (c) Variations of the unit cell volume and angle  $\beta$  of the  $(1-x)$ PFN- $x$ BFO solid solution with composition.

Table S3. Detailed information on the XRD Rietveld refinement results of the PFN-BFO solid solution using the  $R3m$  and  $Pm\bar{3}m$  phases for the compositions with  $x \leq 0.4$ .

| $x$   | Space group  | $a$ (Å)    | $r_{wp}$ | $r_{exp}$ | $r_p$ | $\beta$ (°) |
|-------|--------------|------------|----------|-----------|-------|-------------|
| 0     | $R3m$        | 4.01225(3) | 12.2     | 11.2      | 8.8   | 89.996(2)   |
| 0.025 | $Pm\bar{3}m$ | 4.01159(2) | 11.5     | 10.6      | 8.3   | 90          |
| 0.005 |              | 4.01143(2) | 12.1     | 10.9      | 8.8   | 90          |
| 0.075 |              | 4.01092(3) | 11.9     | 10.8      | 8.7   | 90          |
| 0.1   |              | 4.01032(5) | 12.5     | 7.7       | 8.3   | 90          |
| 0.125 |              | 4.01052(3) | 11.3     | 7.6       | 7.2   | 90          |
| 0.15  |              | 4.00971(2) | 11.3     | 7.2       | 7.2   | 90          |
| 0.2   |              | 4.00900(3) | 10.7     | 8.2       | 6.9   | 90          |
| 0.25  |              | 4.00867(5) | 11.8     | 9.0       | 8.1   | 90          |
| 0.3   |              | 4.00582(2) | 8.6      | 6.4       | 6.5   | 90          |
| 0.35  |              | 4.00441(3) | 10.0     | 6.5       | 7.7   | 90          |
| 0.4   |              | 4.00277(3) | 9.1      | 6.4       | 6.9   | 90          |

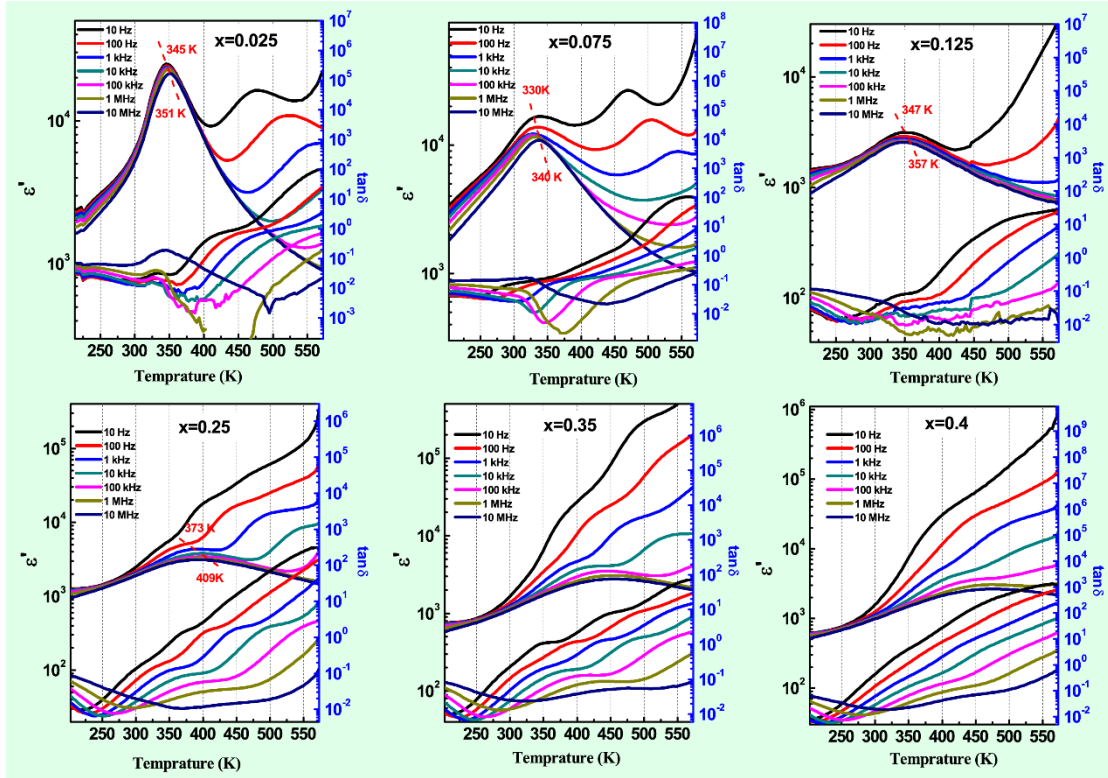

Figure S3. Temperature dependences of the dielectric permittivity ( $\epsilon'$ ) and loss tangent ( $\tan\delta$ ) for the  $(1-x)\text{PFN-}x\text{BFO}$  ( $x = 0.025, 0.075, 0.125, 0.25, 0.35,$  and  $0.4$ ) ceramics measured at different frequencies.

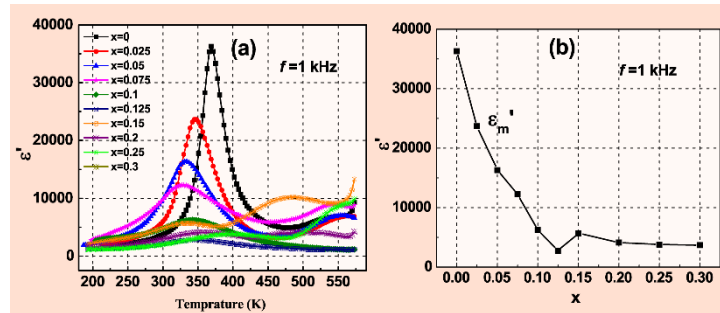

Figure S4. (a) Temperature dependences of the dielectric permittivity ( $\epsilon'$ ) for  $(1-x)\text{PFN-}x\text{BFO}$  ( $x = 0, 0.025, 0.05, 0.075, 0.1, 0.125, 0.15, 0.2, 0.25$  and  $0.3$ ) ceramics measured at 1 kHz. (b) Variation of  $\epsilon'_m$  at 1 kHz as a function of composition for the  $(1-x)\text{PFN-}x\text{BFO}$  ceramics.

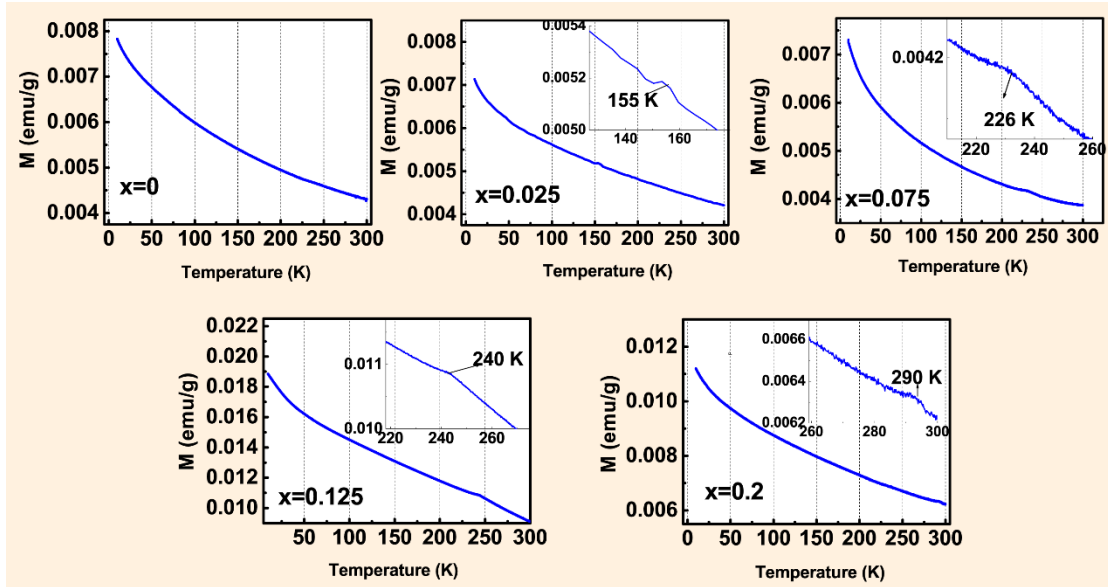

Figure S5. The  $M(T)$  curves of the  $(1-x)\text{PFN}-x\text{BFO}$  ceramics ( $x = 0, 0.025, 0.075, 0.125$  and  $0.2$ ) measured upon heating from 5 K to 300 K under a field of 500 Oe after field cooling. The insets are the enlarged views.

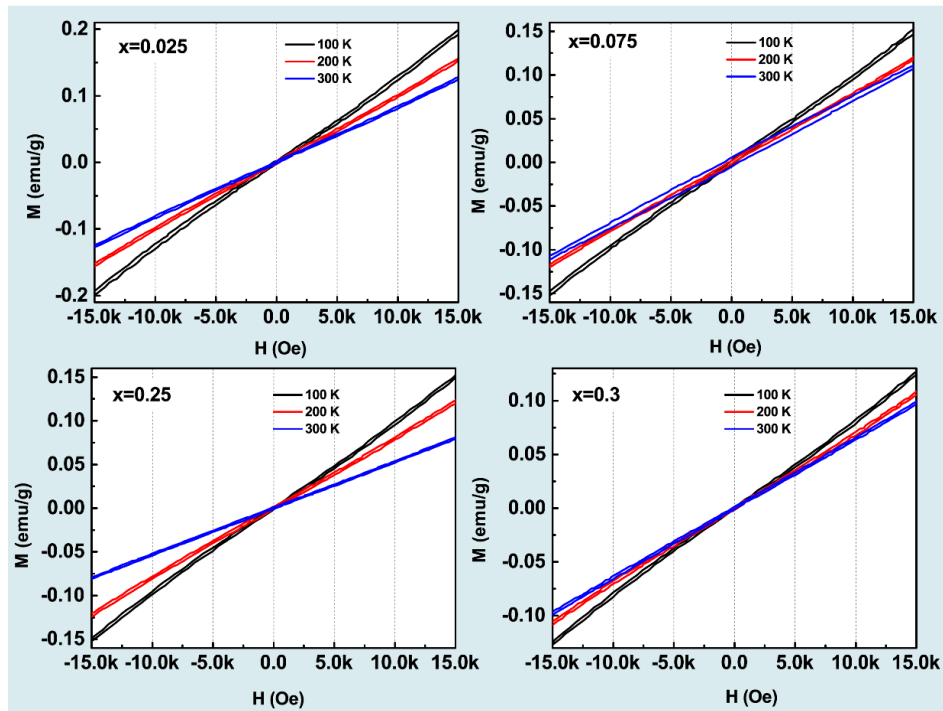

Figure S6. The magnetic hysteresis loops of the  $(1-x)\text{PFN}-x\text{BFO}$  ceramics ( $x = 0.025, 0.075, 0.25$  and  $0.3$ ) measured at 100 K, 200 K and 300 K.
